# Supplementary material for: Vertically stacked SnSe homojunctions and negative capacitance for fast low-power tunneling transistors
Source: Royal Society of Chemistry journal article supplement (doi:10.1039/d0ra03279d), 2020-01-01
Supplement: d0ra03279d1.pdf [file d0ra03279d1.pdf]

## Supplementary Material

### Vertical Stacked SnSe Homojunction and Negative Capacitance for Fast Low-Power Tunneling Transistors

Hong Li<sup>1,\*</sup>, Jiakun Liang<sup>1</sup>, Peipei Xu<sup>1</sup>, Jing Luo<sup>2</sup>, and Fengbin Liu<sup>1</sup>

<sup>1</sup> College of Mechanical and Material Engineering, North China University of Technology,  
Beijing 100144, P. R. China

<sup>2</sup> Beijing Research Institute of Automation for Machinery Industry, Beijing 100120, P. R. China

\*Corresponding author: [lihong@ncut.edu.cn](mailto:lihong@ncut.edu.cn)

**Table S1.** The optimized lattices and band gaps of bulk, BL, and ML SnSe obtained with the PBE, Grimme DFT-D2, and Grimme DFT-D3 functionals using linear combination of atomic orbitals (LCAO) compared with former theoretical data using the projector augmented wave (PAW) formalism and experimental data [1].  $E_g$  values in the parentheses are the direct band gap.

|             |               | <b>a (Å)</b> | <b>b (Å)</b> | <b>c (Å)</b>      | <b><math>E_g</math> (eV)</b> |
|-------------|---------------|--------------|--------------|-------------------|------------------------------|
| <b>Bulk</b> | PBE (LCAO)    | 4.25         | 4.54         | 11.84             | 0.63 (0.87)                  |
|             | D2 (LCAO)     | 4.23         | 4.41         | 11.84             | 0.57 (0.71)                  |
|             | D3 (LCAO)     | 4.25         | 4.60         | 11.86             | 0.72 (1.00)                  |
|             | PBE (PAW) [1] | 4.22         | 4.49         | 11.66             | 0.73                         |
|             | D2 (PAW) [1]  | 4.17         | 4.44         | 11.51             | 0.79                         |
|             | Exp [1]       | 4.15         | 4.44         | 11.50             | 0.86, 0.90                   |
| <b>BL</b>   | PBE (LCAO)    | 4.29         | 4.44         | 2.97 <sup>d</sup> | 0.91 (1.08)                  |
|             | D2 (LCAO)     | 4.24         | 4.41         | 3.17 <sup>d</sup> | 0.80 (1.00)                  |
|             | D3 (LCAO)     | 4.28         | 4.54         | 2.79 <sup>d</sup> | 1.04 (1.20)                  |
|             | D2 (PAW) [1]  | 4.25         | 4.43         | —                 | 0.82                         |
| <b>ML</b>   | D2 (LCAO)     | 4.25         | 4.38         | —                 | 0.88 (0.98)                  |
|             | D2 (PAW) [1]  | 4.30         | 4.36         | —                 | 0.92                         |

<sup>d</sup> is the nearest distance between the two layers.

**Table S2.** Effect of the stacked positions on  $I_{\text{leak}}$  and  $I_{\text{on}}$  of the vertical SnSe homojunction TFET.  $I_{\text{on}}$  of the ITRS HP device is given for comparison. Here,  $L_g = 10$  nm;  $V_{\text{dd}} = 0.74$  V;  $N_s/N_d: 5/5 \times 10^{13}$  cm $^{-2}$ .  $I_{\text{leak}}$ : leakage current;  $I_{\text{off}}$ : off-state current;  $I_{\text{on}}$ : on-state current.

|                | stacked<br>position | $I_{\text{leak}}$<br>( $\mu\text{A}/\mu\text{m}$ ) | $I_{\text{off}}$<br>( $\mu\text{A}/\mu\text{m}$ ) | $I_{\text{on}}$<br>( $\mu\text{A}/\mu\text{m}$ ) |
|----------------|---------------------|----------------------------------------------------|---------------------------------------------------|--------------------------------------------------|
| <i>p</i> -type | left                | 0.0027                                             | 0.1                                               | 716                                              |
|                | central             | 0.0027                                             | 0.1                                               | 791                                              |
|                | right               | 0.0013                                             | 0.1                                               | 444                                              |
| <i>n</i> -type | left                | 0.0027                                             | 0.1                                               | 653                                              |
|                | central             | 0.0027                                             | 0.1                                               | 695                                              |
|                | right               | 0.0013                                             | 0.1                                               | 684                                              |
| ITRS           | —                   | —                                                  | 0.1                                               | 1287                                             |

**Table S3.** Effect of the doping concentration on  $I_{\text{leak}}$  and  $I_{\text{on}}$  of the vertical SnSe homojunction TFET. Those of the ITRS HP/LP devices and that of its planar counterpart are given for comparison. Here, stacked site is central;  $L_g = 10$  nm;  $V_{\text{dd}} = 0.74$  V.  $N_s/N_d$ : source/drain doping concentration.  $I_{\text{leak}}$ : leakage current;  $I_{\text{off}}$ : off-state current;  $I_{\text{on}}$ : on-state current; HP: high performance; LP: lower power.

|                      | $N_s/N_d$<br>( $\times 10^{13}$ cm $^{-2}$ ) | $I_{\text{leak}}$<br>( $\mu\text{A}/\mu\text{m}$ ) | $I_{\text{off}}$ (HP)<br>( $\mu\text{A}/\mu\text{m}$ ) | $I_{\text{on}}$ (HP)<br>( $\mu\text{A}/\mu\text{m}$ ) | $I_{\text{off}}$ (LP)<br>( $\mu\text{A}/\mu\text{m}$ ) | $I_{\text{on}}$ (LP)<br>( $\mu\text{A}/\mu\text{m}$ ) |
|----------------------|----------------------------------------------|----------------------------------------------------|--------------------------------------------------------|-------------------------------------------------------|--------------------------------------------------------|-------------------------------------------------------|
| <i>p</i> -type       | 1/5                                          | $\sim 10^{-4}$                                     | 0.1                                                    | 790                                                   | —                                                      | —                                                     |
|                      | 0.3/5                                        | $\sim 10^{-5}$                                     | 0.1                                                    | 700                                                   | $2 \times 10^{-5}$                                     | 389                                                   |
|                      | 0.1/5                                        | $\sim 10^{-5}$                                     | 0.1                                                    | 727                                                   | $2 \times 10^{-5}$                                     | 488                                                   |
| <i>n</i> -type       | 5/1                                          | $\sim 10^{-4}$                                     | 0.1                                                    | 640                                                   | —                                                      | —                                                     |
|                      | 5/0.3                                        | $\sim 10^{-5}$                                     | 0.1                                                    | 443                                                   | $2 \times 10^{-5}$                                     | 225                                                   |
|                      | 5/0.1                                        | $\sim 10^{-7}$                                     | 0.1                                                    | 722                                                   | $2 \times 10^{-5}$                                     | 235                                                   |
| Planar SnSe TFET [2] | 1/5                                          | $\sim 10^{-2}$                                     | 0.1                                                    | 1667                                                  | —                                                      | —                                                     |
| ITRS                 | —                                            | —                                                  | 0.1                                                    | 1287                                                  | $2 \times 10^{-5}$                                     | 461                                                   |

**Table S4.** The  $SS_{\min}$ ,  $SS_{\text{ave\_4dec}}$ , and  $I_{60}$  of the optimal sub-10 nm vertical SnSe homojunction  $p$ -TFETs.

| $L_g$<br>(nm) | $V_{\text{dd}}$<br>(V) | UL<br>(nm) | $SS_{\min}$<br>(mV/dec) | $SS_{\text{ave\_4dec}}$<br>(mV/dec) | $I_{60}$<br>( $\mu\text{A}/\mu\text{m}$ ) |
|---------------|------------------------|------------|-------------------------|-------------------------------------|-------------------------------------------|
| 10            | 0.74                   | 0          | 43.4                    | 45.8                                | 7                                         |
| 10            | 0.5                    | 0          | 42.0                    | 44.2                                | 5                                         |
| 7             | 0.65                   | 3          | 60.7                    | 71.2                                | —                                         |
| 5             | 0.65                   | 5          | 66.7                    | 90.1                                | —                                         |

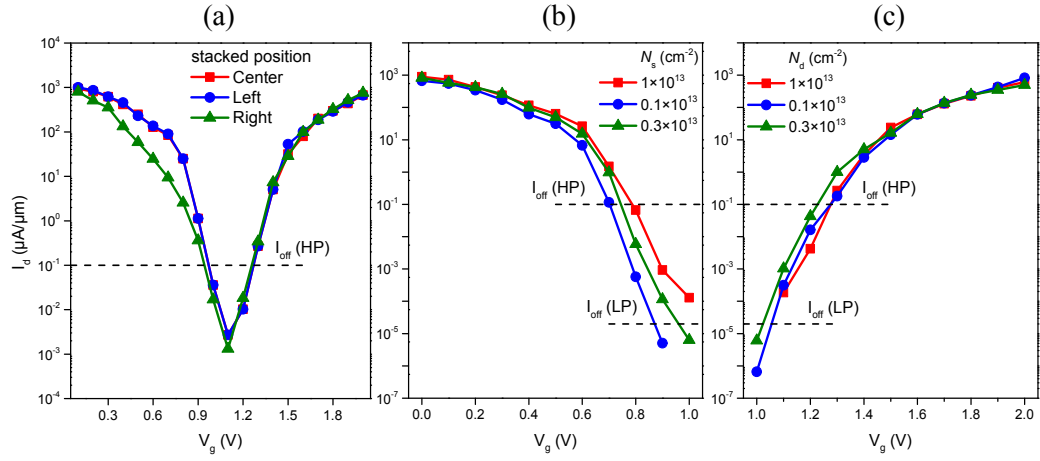

**Figure S1.** Transfer characteristics of the vertical SnSe homojunction TFETs with (a) stacked position and (b-c) doping concentrations.

## References

- [1] Y.C. Huang, X. Chen, C. Wang, L. Peng, Q. Qian, S.F. Wang, Layer-dependent electronic properties of phosphorene-like materials and phosphorenebased van der Waals heterostructures, *Nanoscale*, 9 (2017) 8616-8622.
- [2] H. Li, P. Xu, J. Lu, Sub-10 nm tunneling field-effect transistors based on monolayer group IV monochalcogenides, *Nanoscale*, 11 (2019) 23392-23401.
